# Supplementary material
Source: PubMed Central journal article supplement (PMC2993421)
Supplement: 1010005107_pnas.1010005107_SI.pdf [file 1010005107_pnas.1010005107_SI.pdf]

# Supporting Information

Armache et al. 10.1073/pnas.1010005107

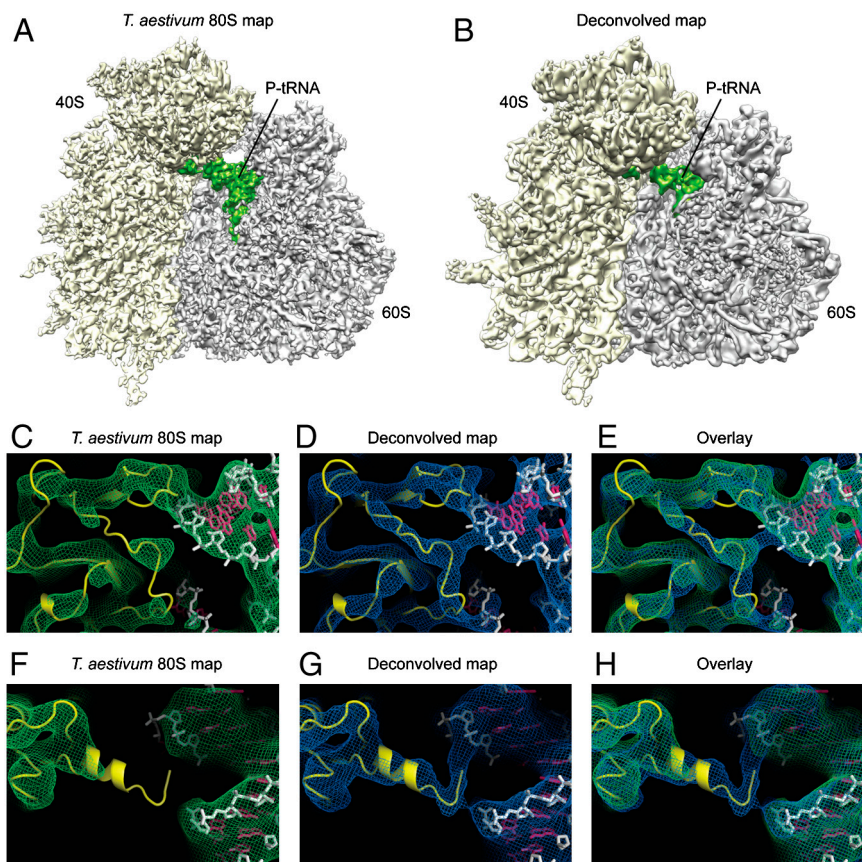

**Fig. S1.** Comparison of pre- and postdeconvolution sharpened maps. (A) pre- and (B) postdeconvolution cryo-EM maps of the *Triticum aestivum* 80S ribosome, with small and large subunits in yellow and gray, respectively, and P-tRNA colored green. Examples of (C and F) pre- and (D and G) postdeconvolution maps (mesh), with overlays shown in E and H, respectively. R proteins are shown as yellow ribbons and rRNA nucleotides with white backbone and red bases.



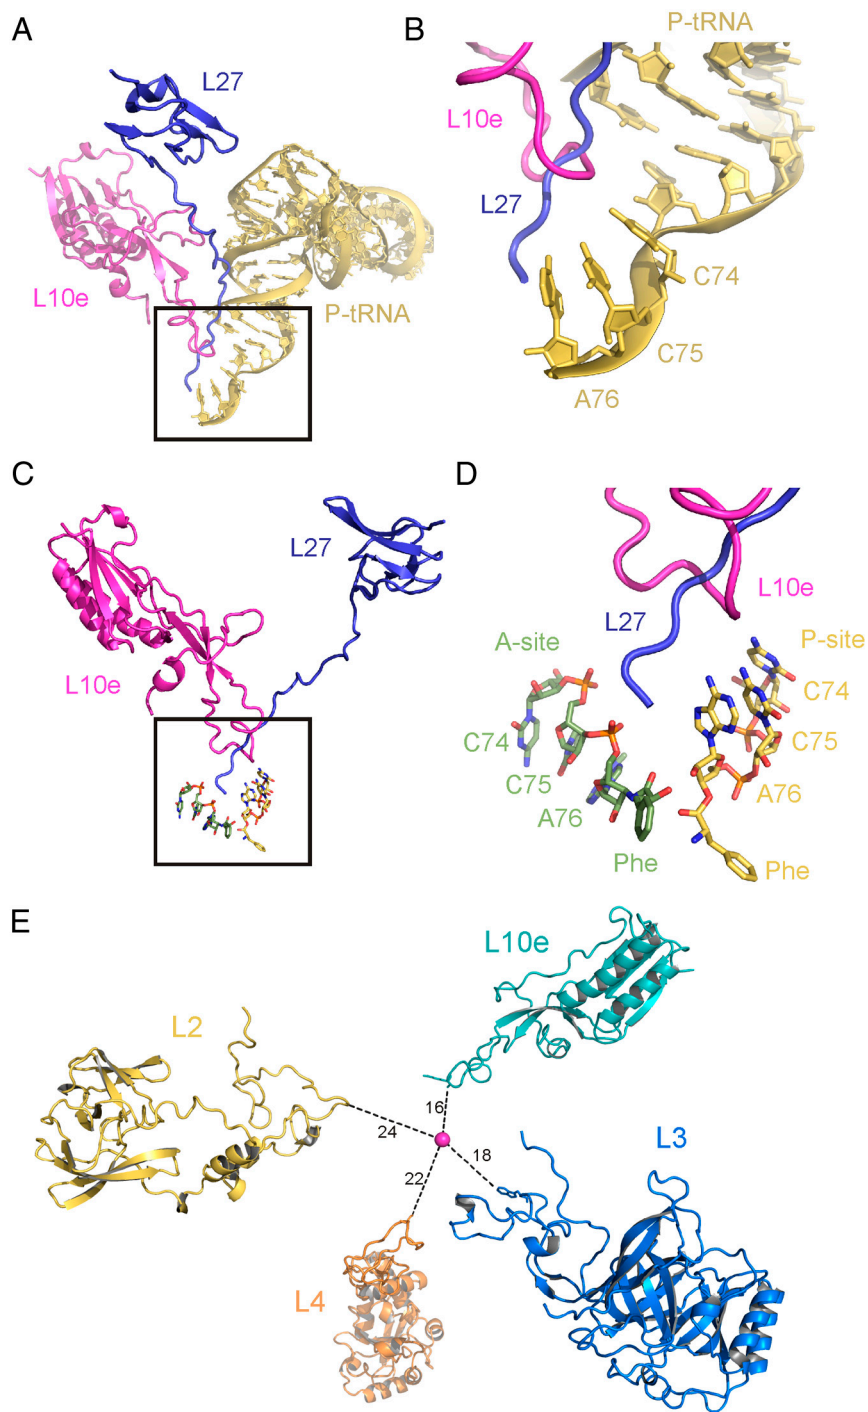

**Fig. S3.** Ribosomal proteins that approach the peptidyltransferase center of the ribosome. (*A* and *B*) Comparison of the relative positions of the N terminus of bacterial r-protein L27 (blue) and eukaryotic L10e (magenta) with a tRNA in the P site (yellow). (*C* and *D*) Comparison of the relative positions of the N terminus of bacterial r-protein L27 (blue) (1) and eukaryotic L10e (magenta) with the CCA-ends of tRNA mimics in A- (green) and P site (yellow) (2). (*E*) R-proteins L2p (yellow), L3p (blue), L4p (orange), and L10e (aqua) come within approximately 24, 22, 18, and 16 Å of the site of peptide bond formation, based on ref. 3.

1 Voorhees RM, et al. (2009) Insights into substrate stabilization from snapshots of the peptidyl transferase center of the intact 70S ribosome. *Nat Struct Mol Biol* 16:528–533.

2 Hansen JL, Schmeing TM, Moore PB, Steitz TA (2002) Structural insights into peptide bond formation. *Proc Natl Acad Sci USA* 99:11670–11675.

3 Nissen P, et al. (2000) The structural basis of ribosome activity in peptide bond synthesis. *Science* 289:920–930.

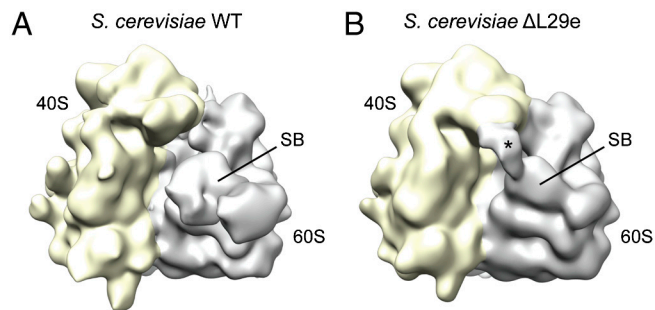

Fig. S4. Localization of ribosomal protein L29e. Reconstruction of (A) *Saccharomyces cerevisiae* WT 80S ribosome, compared to (B) reconstruction of *S. cerevisiae* 80S ribosomes isolated from a strain lacking the gene for L29e. In B, the rearranged position of the stalk base (SB) on the large subunit (gray) leads to a contact between the stalk (\*) and the head of the small 40S subunit (yellow).

**Table S1. Nomenclature for r proteins of the *Saccharomyces cerevisiae* and *Triticum aestivum***

|    | Family name | <i>S. cerevisiae</i> name | <i>Oryza sativa</i> name |
|----|-------------|---------------------------|--------------------------|
| 1  | S2p         | rpS0                      | Sa                       |
| 2  | S3p         | rpS3                      | S3                       |
| 3  | S3ae        | rpS1                      | S3a                      |
| 4  | S4p         | rpS9                      | S9                       |
| 5  | S4e         | rpS4                      | S4                       |
| 6  | S5p         | rpS2                      | S2                       |
| 7  | S6e         | rpS6                      | S6                       |
| 8  | S7p         | rpS5                      | S5                       |
| 9  | S7e         | rpS7                      | S7                       |
| 10 | S8p         | rpS22                     | S15a                     |
| 11 | S8e         | rpS8                      | S8                       |
| 12 | S9p         | rpS16                     | S16                      |
| 13 | S10p        | rpS20                     | S20                      |
| 14 | S10e        | rpS10                     | S10                      |
| 15 | S11p        | rpS14                     | S14                      |
| 16 | S12p        | rpS23                     | S23                      |
| 17 | S12e        | rpS12                     | S12                      |
| 18 | S13p        | rpS18                     | S18                      |
| 19 | S14p        | rpS29                     | S29                      |
| 20 | S15p        | rpS13                     | S13                      |
| 21 | S17p        | rpS11                     | S11                      |
| 22 | S17e        | rpS17                     | S17                      |
| 23 | S19p        | rpS15                     | S15                      |
| 24 | S19e        | rpS19                     | S19                      |
| 25 | S21e        | rpS21                     | S21                      |
| 26 | S24e        | rpS24                     | S24                      |
| 27 | S25e        | rpS25                     | S25                      |
| 28 | S26e        | rpS26                     | S26                      |
| 29 | S27e        | rpS27                     | S27                      |
| 30 | S27ae       | rpS31                     | S27a                     |
| 31 | S28e        | rpS28                     | S28                      |
| 32 | S30e        | rpS30                     | S30                      |
| 33 | RACK1       | RACK1                     | RACK1                    |



Table S2. Summary of modeled wheat germ small subunit r proteins

| Protein name                 | Protein family | Organism                 | Acc. no.                 | Size, aa | Modeled length, aa | Modeled range, aa | Percent modeled, % | Template                                    | PDB ID |
|------------------------------|----------------|--------------------------|--------------------------|----------|--------------------|-------------------|--------------------|---------------------------------------------|--------|
| Sa                           | S2p            | <i>Oryza sativa</i>      | Q8H3I3                   | 305      | 260                | 1–260             | 85                 | <i>Thermus thermophilus</i>                 | 2J00_B |
| S2                           | S5p            | <i>Oryza sativa</i>      | Q84M35                   | 274      | 263                | 1–263             | 96                 | <i>Escherichia coli</i>                     | 92     |
| 2QAL_E                       | S3             | S3p                      | <i>Triticum aestivum</i> |          | Q8L804             | 227               | 208                |                                             |        |
| <i>Escherichia coli</i>      | 2QAL_C         |                          |                          |          |                    |                   |                    |                                             |        |
| S4*                          | S4e            | <i>Oryza sativa</i>      | P49398                   | 265      | 200                | 43–242            | 75                 | <i>Thermoplasma acidophilum</i>             | 96     |
| 3KBG_A                       | S5             | S7p                      | <i>Oryza sativa</i>      |          | Q93VC6             | 200               | 191                |                                             |        |
| <i>Pyrococcus horikoshii</i> | 1IQV_A         |                          |                          |          |                    |                   |                    |                                             |        |
| S7                           | S7e            | <i>Triticum aestivum</i> | Q517K2                   | 192      | 143                | 1–143             | 74                 | <i>Polyalanine</i>                          | —      |
| S9                           | S4p            | <i>Oryza sativa</i>      | Q2R1J8                   | 195      | 195                | 1–195             | 100                | <i>Thermus thermophilus</i>                 | 2J00_D |
| S11                          | S17p           | <i>Oryza sativa</i>      | Q7XIK5                   | 161      | 85                 | 40–124            | 53                 | <i>Thermus thermophilus</i>                 | 2J00_Q |
| S13                          | S15p           | <i>Oryza sativa</i>      | Q69UI2                   | 151      | 121                | 31–151            | 80                 | <i>Escherichia coli</i>                     |        |
| 2QAL_O                       | S14            | S11p                     | <i>Oryza sativa</i>      |          | Q6H7T1             | 150               | 119                |                                             | 79     |
| <i>Thermus thermophilus</i>  | 2J00_K         |                          |                          |          |                    |                   |                    |                                             |        |
| S15                          | S19p           | <i>Oryza sativa</i>      | P31674                   | 154      | 91                 | 58–148            | 59                 | <i>Escherichia coli</i>                     | 85     |
| 2QAL_S                       | S16            | S9p                      | <i>Oryza sativa</i>      |          | Q0IQF7             | 149               | 126                |                                             |        |
| <i>Thermus thermophilus</i>  | 2J00_I         |                          |                          |          |                    |                   |                    |                                             |        |
| S17                          | S17e           | <i>Oryza sativa</i>      | Q7XEQ3                   | 141      | 141                | 1–141             | 100                | <i>Methanobacterium thermoautotrophicum</i> | 100    |
| 1RQ6_A                       | S18            | S13p                     | <i>Triticum aestivum</i> |          | Q8L806             | 152               | 152                |                                             |        |
| <i>Escherichia coli</i>      | 2QAL_M         |                          |                          |          |                    |                   |                    |                                             |        |
| S19                          | S19e           | <i>Oryza sativa</i>      | P40978                   | 146      | 146                | 1–146             | 100                | <i>Pyrococcus abyssi</i>                    | 100    |
| 2V7F_A                       | S20            | S10p                     | <i>Oryza sativa</i>      | P35686   | 128                | 128               | 1–128              |                                             |        |
| <i>Thermus thermophilus</i>  | 2J00_J         |                          |                          |          |                    |                   |                    |                                             |        |
| S21                          | S21e           | <i>Oryza sativa</i>      | P35687                   | 82       | 82                 | 1–82              | 100                | <i>de novo</i>                              | —      |
| S15a                         | S8p            | <i>Oryza sativa</i>      | Q84AP1                   | 130      | 130                | 1–130             | 100                | <i>Escherichia coli</i>                     | 100%   |
| 2QAL_H                       | S23            | S12p                     | <i>Oryza sativa</i>      |          | Q8L4F2             | 142               | 142                |                                             |        |
| <i>Thermus thermophilus</i>  | 2J00_L         |                          |                          |          |                    |                   |                    |                                             |        |
| S24                          | S24e           | <i>Oryza sativa</i>      | Q6H541                   | 138      | 98                 | 5–102             | 71                 | <i>Pyrococcus abyssi</i>                    | 93     |
| 2V94_A                       | S25            | S25e                     | <i>Oryza sativa</i>      |          | Q53QG2             | 108               | 100                |                                             |        |
| <i>Pyrococcus horikoshii</i> | 1UB9_A         |                          |                          |          |                    |                   |                    |                                             |        |
| S26                          | S26e           | <i>Oryza sativa</i>      | P49216                   | 133      | 92                 | 1–31; 73–133      | 69                 | <i>Polyalanine</i>                          | —      |
| S27                          | S27e           | <i>Oryza sativa</i>      | Q6K5R5                   | 86       | 50                 | 33–82             | 58                 | <i>Archeoglobus fulgidus</i>                | 89     |
| 1QXF_A                       | S28            | S28e                     | <i>Triticum aestivum</i> |          | Q7X9K4             | 65                | 58                 |                                             |        |
| <i>Pyrococcus horikoshii</i> | 1NY4_A         |                          |                          |          |                    |                   |                    |                                             |        |
| S29                          | S14p           | <i>Triticum aestivum</i> | Q517K3                   | 56       | 48                 | 9–56              | 86                 | <i>Thermus thermophilus</i>                 | 2J00_N |
| S30                          | S30e           | <i>Oryza sativa</i>      | Q6K853                   | 62       | 62                 | 1–62              | 100                | <i>de novo</i>                              | —      |
| RACK1                        | RACK1          | <i>Triticum aestivum</i> | Q8LNY6                   | 380      | 380                | 1–380             | 100                | <i>Mus musculus</i>                         | 2PBL_B |

Acc., accession; PDB, Protein Data Bank.

\*Bold rows indicate newly localized r proteins in this study, compared to the bacterial and archaeal X-ray structures.

Table S3. Summary of modeled wheat germ large subunit r proteins

| Protein name | Protein family | Organism                 | Acc. no. | Size, aa | Modeled length | Modeled range | Percent modeled, % | Template                                                             | PDB ID            |
|--------------|----------------|--------------------------|----------|----------|----------------|---------------|--------------------|----------------------------------------------------------------------|-------------------|
| L1           | L1p            | <i>Triticum aestivum</i> | Q5I7L3   | 216      | 216            | 1–216         | 100                | <i>Thermus thermophilus</i>                                          | 2HW8_A            |
| L2           | L2p            | <i>Oryza sativa</i>      | Q2QNFB   | 261      | 255            | 1–255         | 98                 | <i>Haloarcula marismortui</i>                                        | 1VQ8_A            |
| L3           | L3p            | <i>Triticum aestivum</i> | Q7X744   | 389      | 389            | 1–389         | 100                | <i>Haloarcula marismortui</i>                                        | 1VQ8_B            |
| L4           | L4p/L4e        | <i>Oryza sativa</i>      | Q6ZLB8   | 405      | 372            | 1–269;303–405 | 92                 | <i>Haloarcula marismortui</i>                                        | 1VQ8_C            |
| L5           | L18p           | <i>Oryza sativa</i>      | Q8L4L4   | 304      | 304            | 1–304         | 100                | <i>Haloarcula marismortui</i>                                        | 1VQ8_N            |
| L6*          | L6e            | <i>Triticum aestivum</i> | Q5I7L4   | 219      | 219            | 1–219         | 100                | <i>Sulfolobus solfataricus</i>                                       | 2JOY_A            |
| L7           | L30p           | <i>Triticum aestivum</i> | Q5I7K6   | 244      | 244            | 1–244         | 100                | <i>Haloarcula marismortui</i>                                        | 1VQ8_W            |
| L7a          | L7ae           | <i>Oryza sativa</i>      | P35685   | 258      | 201            | 58–258        | 78                 | <i>Haloarcula marismortui</i>                                        | 1VQ8_F            |
| L9           | L6p            | <i>Oryza sativa</i>      | P49210   | 190      | 190            | 1–190         | 100                | <i>Haloarcula marismortui</i>                                        | 1VQ8_E            |
| L10          | L10e           | <i>Oryza sativa</i>      | Q0IT58   | 224      | 192            | 33–224        | 86                 | <i>Haloarcula marismortui</i>                                        | 3CC2_H            |
| L11          | L5p            | <i>Triticum aestivum</i> | Q5I7L2   | 180      | 170            | 1–170         | 94                 | <i>H. marismortui/T. thermophilus</i>                                | 1VQ8_D/2J01_G     |
| L12          | L11p           | <i>Oryza sativa</i>      | Q0JAI2   | 166      | 128            | 12–139        | 77                 | <i>Haloarcula marismortui</i>                                        | 2QA4_I            |
| L13          | L13e           | <i>Oryza sativa</i>      | Q7XJB4   | 208      | 182            | 13–194        | 88                 | <b>Polyalanine</b>                                                   | —                 |
| L14          | L14e           | <i>Oryza sativa</i>      | Q7XJ52   | 134      | 134            | 1–134         | 100                | <i>Sulfolobus solfataricus</i>                                       | 2JOY_A            |
| L15          | L15e           | <i>Oryza sativa</i>      | Q8H851   | 204      | 194            | 1–194         | 95                 | <i>Haloarcula marismortui</i>                                        | 3CC2_M            |
| L13a         | L13p           | <i>Triticum aestivum</i> | Q5I7L1   | 206      | 206            | 1–206         | 100                | <i>Haloarcula marismortui</i>                                        | 1VQ8_J            |
| L17          | L22p           | <i>Oryza sativa</i>      | Q6ZIA1   | 171      | 171            | 1–171         | 100                | <i>Haloarcula marismortui</i>                                        | 1VQ8_R            |
| L18          | L18e           | <i>Triticum aestivum</i> | Q5I7L0   | 188      | 163            | 1–163         | 87                 | <i>Haloarcula marismortui</i>                                        | 1VQ8_O            |
| L18a         | L18ae          | <i>Oryza sativa</i>      | Q7XY20   | 178      | 167            | 1–167         | 94                 | <i>Methanobacterium thermoautotrophicum</i>                          | 2JXT_A            |
| L19          | L19e           | <i>Triticum aestivum</i> | Q943F3   | 209      | 189            | 1–189         | 90                 | <i>Haloarcula marismortui</i>                                        | 1VQ8_P            |
| L21          | L21e           | <i>Triticum aestivum</i> | Q7XYC9   | 164      | 164            | 1–164         | 100                | <i>Haloarcula marismortui</i>                                        | 1VQ8_Q            |
| L22          | L22e           | <i>Oryza sativa</i>      | Q6YSX0   | 130      | 108            | 14–121        | 83                 | <b>Artificial gene</b>                                               | 2KL8_A            |
| L23          | L14p           | <i>Triticum aestivum</i> | Q5I7K4   | 140      | 140            | 1–140         | 100                | <i>Haloarcula marismortui</i>                                        | 1VQ8_K            |
| L24          | L24e           | <i>Oryza sativa</i>      | Q5N754   | 162      | 75             | 1–75          | 46                 | <i>Haloarcula marismortui</i>                                        | 1VQ8_U            |
| L23a         | L23p           | <i>Oryza sativa</i>      | Q0JBZ7   | 152      | 122            | 31–152        | 80                 | <i>Haloarcula marismortui</i>                                        | 1VQ8_S            |
| L26          | L24p           | <i>Oryza sativa</i>      | Q2QXN5   | 150      | 130            | 1–130         | 87                 | <i>Haloarcula marismortui</i>                                        | 1VQ8_T            |
| L27a         | L15p           | <i>Oryza sativa</i>      | Q6EUQ7   | 144      | 144            | 1–144         | 100                | <i>Haloarcula marismortui</i>                                        | 1VQ8_L            |
| L27          | L27e           | <i>Oryza sativa</i>      | Q7XC31   | 136      | 99             | 1–99          | 73                 | <i>Sulfolobus solfataricus</i>                                       | 2JOY_A            |
| L28          | L28e           | <i>Oryza sativa</i>      | Q5TKP3   | 147      | 73             | 58–130        | 50                 | <b>de novo</b>                                                       | —                 |
| L29          | L29e           | <i>Oryza sativa</i>      | Q9FP55   | 60       | 23             | 38–60         | 38                 | <i>Oryctolagus cuniculus</i>                                         | 1UTG_A            |
| L30          | L30e           | <i>Triticum aestivum</i> | Q5I7K9   | 112      | 112            | 1–112         | 100                | <i>Saccharomyces cerevisiae</i>                                      | 1CN7_A            |
| L31          | L31e           | <i>Triticum aestivum</i> | Q6ZGV5   | 123      | 120            | 1–120         | 98                 | <i>Haloarcula marismortui</i>                                        | 1VQ8_X            |
| L32          | L32e           | <i>Oryza sativa</i>      | Q3MST7   | 133      | 133            | 1–133         | 100                | <i>Haloarcula marismortui</i>                                        | 1VQ8_Y            |
| L34          | L34e           | <i>Triticum aestivum</i> | Q5I7K8   | 119      | 119            | 1–119         | 100                | <i>Rhodobacter capsulatus</i>                                        | 2PPT_A            |
| L35a         | L35ae          | <i>Oryza sativa</i>      | Q6I608   | 111      | 104            | 1–104         | 94                 | <i>Pyrococcus furiosus</i>                                           | 1SQR_A            |
| L35          | L29p           | <i>Triticum aestivum</i> | Q8L805   | 124      | 124            | 1–124         | 100                | <i>Haloarcula marismortui</i>                                        | 1VQ8_V            |
| L36          | L36e           | <i>Triticum aestivum</i> | Q5I7L5   | 112      | 77             | 27–103        | 69                 | <i>Archeoglobus fulgidus</i>                                         | 2OEB_A            |
| L37          | L37e           | <i>Oryza sativa</i>      | Q6Z8Y5   | 94       | 94             | 1–94          | 100                | <i>Haloarcula marismortui</i>                                        | 1VQ8_1            |
| L38          | L38e           | <i>Oryza sativa</i>      | Q8GVY2   | 69       | 69             | 1–69          | 100                | <i>Homo sapiens</i>                                                  | 1WH9_A            |
| L39          | L39e           | <i>Triticum aestivum</i> | Q5I7K7   | 51       | 51             | 1–51          | 100                | <i>Haloarcula marismortui</i>                                        | 1VQ8_2            |
| L40          | L40e           | <i>Oryza sativa</i>      | P35296   | 53       | 41             | 13–53         | 77                 | <i>Sulfolobus solfataricus</i>                                       | 2AYJ_A            |
| L41          | L41e           | <i>Oryza sativa</i>      | P62125   | 25       | 25             | 1–25          | 100                | <b>de novo</b>                                                       | —                 |
| L42          | L44e           | <i>Oryza sativa</i>      | Q8H5N0   | 105      | 105            | 1–105         | 100                | <i>Haloarcula marismortui</i>                                        | 1VQ8_3            |
| L43          | L37ae          | <i>Oryza sativa</i>      | Q5QM99   | 92       | 92             | 1–92          | 100                | <i>Haloarcula marismortui</i>                                        | 3CC2_Z            |
| P0           | L10p           | <i>Oryza sativa</i>      | P41095   | 319      | 262            | 1–262         | 82                 | <i>Pyrococcus horikoshii</i> and <i>Methanocaldococcus janaschii</i> | 3A1Y_G and 3JSY_A |
| P1           | L12p           | <i>Triticum aestivum</i> | Q5I7K5   | 110      | 58             | 6–63          | 53                 | <i>Pyrococcus horikoshii</i>                                         | 3A1Y_E            |
| P2           | L12p           | <i>Triticum aestivum</i> | Q7X729   | 112      | 59             | 1–59          | 53                 | <i>Pyrococcus horikoshii</i>                                         | 3A1Y_F            |

Acc., accession; PDB, Protein Data Bank.

\*Bold rows indicate newly localized r proteins in this study, compared to the bacterial and archaeal X-ray structures.

Table S4. Summary of modeled yeast small subunit r proteins

| Protein name | Protein family | Organism                        | Acc. no. | Size, aa | Modeled length, aa | Modeled range, aa | Percent modeled, % | Template                                    | PDB ID |
|--------------|----------------|---------------------------------|----------|----------|--------------------|-------------------|--------------------|---------------------------------------------|--------|
| rpS0         | S2p            | <i>Saccharomyces cerevisiae</i> | P32905   | 252      | 252                | 1–252             | 100                | <i>Thermus thermophilus</i>                 | 2J00_B |
| rpS2         | S5p            | <i>Saccharomyces cerevisiae</i> | P25443   | 254      | 254                | 1–254             | 100                | <i>Escherichia coli</i>                     | 2QAL_E |
| rpS3         | S3p            | <i>Saccharomyces cerevisiae</i> | P05750   | 240      | 204                | 12–215            | 85                 | <i>Escherichia coli</i>                     | 2QAL_C |
| rpS4*        | S4e            | <i>Saccharomyces cerevisiae</i> | P05753   | 261      | 200                | 43–242            | 77                 | <i>Thermoplasma acidophilum</i>             | 3KBG_A |
| rpS5         | S7p            | <i>Saccharomyces cerevisiae</i> | P26783   | 225      | 199                | 27–225            | 88                 | <i>Pyrococcus horikoshii</i>                | 1IQV_A |
| rpS7         | S7e            | <i>Saccharomyces cerevisiae</i> | P26786   | 190      | 143                | 1–143             | 75                 | <i>Polyalanine</i>                          | —      |
| rpS9         | S4p            | <i>Saccharomyces cerevisiae</i> | O13516   | 197      | 197                | 1–197             | 100                | <i>Thermus thermophilus</i>                 | 2J00_D |
| rpS11        | S17p           | <i>Saccharomyces cerevisiae</i> | P26781   | 156      | 85                 | 39–123            | 54                 | <i>Thermus thermophilus</i>                 | 2J00_Q |
| rpS13        | S15p           | <i>Saccharomyces cerevisiae</i> | P05756   | 151      | 121                | 31–151            | 80                 | <i>Escherichia coli</i>                     | 2QAL_O |
| rpS14        | S11p           | <i>Saccharomyces cerevisiae</i> | P06367   | 137      | 119                | 19–137            | 87                 | <i>Thermus thermophilus</i>                 | 2J00_K |
| rpS15        | S19p           | <i>Saccharomyces cerevisiae</i> | Q01855   | 142      | 88                 | 49–136            | 62                 | <i>Escherichia coli</i>                     | 2QAL_S |
| rpS16        | S9p            | <i>Saccharomyces cerevisiae</i> | P40213   | 143      | 126                | 18–143            | 88                 | <i>Thermus thermophilus</i>                 | 2J00_I |
| rpS17        | S17e           | <i>Saccharomyces cerevisiae</i> | P02407   | 136      | 136                | 1–136             | 100                | <i>Methanobacterium thermoautotrophicum</i> | 1RQ6_A |
| rpS18        | S13p           | <i>Saccharomyces cerevisiae</i> | P35271   | 146      | 140                | 7–146             | 96                 | <i>Escherichia coli</i>                     | 2QAL_M |
| rpS19        | S19e           | <i>Saccharomyces cerevisiae</i> | P07280   | 144      | 144                | 1–144             | 100                | <i>Pyrococcus abyssi</i>                    | 2V7F_A |
| rpS20        | S10p           | <i>Saccharomyces cerevisiae</i> | P38701   | 121      | 113                | 9–121             | 93                 | <i>Thermus thermophilus</i>                 | 2J00_J |
| rpS21        | S21e           | <i>Saccharomyces cerevisiae</i> | P0C0V8   | 87       | 87                 | 1–87              | 100                | de novo                                     | —      |
| rpS22        | S8p            | <i>Saccharomyces cerevisiae</i> | P0C0W1   | 130      | 130                | 1–130             | 100                | <i>Escherichia coli</i>                     | 2QAL_H |
| rpS23        | S12p           | <i>Saccharomyces cerevisiae</i> | P32827   | 145      | 145                | 1–145             | 100                | <i>Thermus thermophilus</i>                 | 2J00_L |
| rpS24        | S24e           | <i>Saccharomyces cerevisiae</i> | P26782   | 135      | 96                 | 1–96              | 71                 | <i>Pyrococcus abyssi</i>                    | 2V94_A |
| rpS25        | S25e           | <i>Saccharomyces cerevisiae</i> | Q3E792   | 108      | 85                 | 24–108            | 78                 | <i>Pyrococcus horikoshii</i>                | 1UB9_A |
| rpS26        | S26e           | <i>Saccharomyces cerevisiae</i> | P39938   | 119      | 92                 | 1–31;59–119       | 77                 | de novo                                     | —      |
| rpS27        | S27e           | <i>Saccharomyces cerevisiae</i> | P35997   | 82       | 50                 | 31–80             | 61                 | <i>Archeoglobus fulgidus</i>                | 1QXF_A |
| rpS28        | S28e           | <i>Saccharomyces cerevisiae</i> | Q3E7X9   | 67       | 60                 | 1–60              | 90                 | <i>Pyrococcus horikoshii</i>                | 1NY4_A |
| rpS29        | S14p           | <i>Saccharomyces cerevisiae</i> | P41057   | 56       | 48                 | 9–56              | 86                 | <i>Thermus thermophilus</i>                 | 2J00_N |
| rpS30        | S30e           | <i>Saccharomyces cerevisiae</i> | Q12087   | 63       | 63                 | 1–63              | 100                | de novo                                     | —      |
| RACK1        | RACK1          | <i>Saccharomyces cerevisiae</i> | P38011   | 319      | 319                | 1–319             | 100                | <i>Mus musculus</i>                         | 2PBI_B |

Acc., accession; PDB, Protein Data Bank.

\*Bold rows indicate newly localized r proteins in this study, compared to the bacterial and archaeal X-ray structures.



Table S5. Summary of modeled yeast large subunit r proteins

| Protein name | Protein family | Organism                               | Acc.no.       | Size, Modeled |            | Modeled range      | Percent modeled, % | Template                                                                | PDB ID               |
|--------------|----------------|----------------------------------------|---------------|---------------|------------|--------------------|--------------------|-------------------------------------------------------------------------|----------------------|
|              |                |                                        |               | aa            | length     |                    |                    |                                                                         |                      |
| rpL1         | L1p            | <i>Saccharomyces cerevisiae</i>        | P53030        | 217           | 217        | 1–217              | 100                | <i>Thermus thermophilus</i>                                             | 2HW8_A               |
| rpL2         | L2p            | <i>Saccharomyces cerevisiae</i>        | P05736        | 254           | 254        | 1–254              | 100                | <i>Haloarcula marismortui</i>                                           | 1VQ8_A               |
| rpL3         | L3p            | <i>Saccharomyces cerevisiae</i>        | P14126        | 387           | 387        | 1–387              | 100                | <i>Haloarcula marismortui</i>                                           | 1VQ8_B               |
| rpL4         | L4p/L4e        | <i>Saccharomyces cerevisiae</i>        | P10664        | 362           | 329        | 1–261 ;<br>295–362 | 91                 | <i>Haloarcula marismortui</i>                                           | 1VQ8_C               |
| rpL5         | L18p           | <i>Saccharomyces cerevisiae</i>        | P26321        | 297           | 297        | 1–297              | 100                | <i>Haloarcula marismortui</i>                                           | 1VQ8_N               |
| <b>rpL6*</b> | <b>L6e</b>     | <b><i>Saccharomyces cerevisiae</i></b> | <b>Q02326</b> | <b>176</b>    | <b>176</b> | <b>1–176</b>       | <b>100</b>         | <b><i>Sulfolobus solfataricus</i></b>                                   | <b>2JOY_A</b>        |
| rpL7         | L30p           | <i>Saccharomyces cerevisiae</i>        | P05737        | 244           | 239        | 6–244              | 98                 | <i>Haloarcula marismortui</i>                                           | 1VQ8_W               |
| rpL8         | L7ae           | <i>Saccharomyces cerevisiae</i>        | P17076        | 256           | 197        | 60–256             | 77                 | <i>Haloarcula marismortui</i>                                           | 1VQ8_F               |
| rpL9         | L6p            | <i>Saccharomyces cerevisiae</i>        | P05738        | 191           | 191        | 1–191              | 100                | <i>Haloarcula marismortui</i>                                           | 1VQ8_E               |
| rpL10        | L10e           | <i>Saccharomyces cerevisiae</i>        | P41805        | 221           | 189        | 33–221             | 86                 | <i>Haloarcula marismortui</i>                                           | 3CC2_H               |
| rpL11        | L5p            | <i>Saccharomyces cerevisiae</i>        | P0C0W9        | 174           | 168        | 1–168              | 96                 | <i>Haloarcula marismortui</i><br>and <i>Thermus thermophilus</i>        | 1VQ8_D<br>and 2J01_G |
| rpL12        | L11p           | <i>Saccharomyces cerevisiae</i>        | P17079        | 165           | 127        | 12–138             | 77                 | <i>Haloarcula marismortui</i>                                           | 2QA4_I               |
| <b>rpL13</b> | <b>L13e</b>    | <b><i>Saccharomyces cerevisiae</i></b> | <b>Q12690</b> | <b>199</b>    | <b>169</b> | <b>14–182</b>      | <b>85</b>          | <b>Polyalanine</b>                                                      | —                    |
| <b>rpL14</b> | <b>L14e</b>    | <b><i>Saccharomyces cerevisiae</i></b> | <b>P36105</b> | <b>138</b>    | <b>138</b> | <b>1–138</b>       | <b>100</b>         | <b><i>Sulfolobus solfataricus</i></b>                                   | <b>2JOY_A</b>        |
| rpL15        | L15e           | <i>Saccharomyces cerevisiae</i>        | P05748        | 204           | 193        | 1–193              | 95                 | <i>Haloarcula marismortui</i>                                           | 3CC2_M               |
| rpL16        | L13p           | <i>Saccharomyces cerevisiae</i>        | P26784        | 199           | 199        | 1–199              | 100                | <i>Haloarcula marismortui</i>                                           | 1VQ8_J               |
| rpL17        | L22p           | <i>Saccharomyces cerevisiae</i>        | P05740        | 184           | 170        | 1–170              | 92                 | <i>Haloarcula marismortui</i>                                           | 1VQ8_R               |
| rpL18        | L18e           | <i>Saccharomyces cerevisiae</i>        | P07279        | 186           | 161        | 1–161              | 87                 | <i>Haloarcula marismortui</i>                                           | 1VQ8_O               |
| rpL19        | L19e           | <i>Saccharomyces cerevisiae</i>        | P05735        | 189           | 189        | 1–189              | 100                | <i>Haloarcula marismortui</i>                                           | 1VQ8_P               |
| <b>rpL20</b> | <b>L18ae</b>   | <b><i>Saccharomyces cerevisiae</i></b> | <b>P0C210</b> | <b>172</b>    | <b>167</b> | <b>1–167</b>       | <b>97</b>          | <b><i>Methanobacterium thermoautotrophicum</i></b>                      | <b>2JXT_A</b>        |
| rpL21        | L21e           | <i>Saccharomyces cerevisiae</i>        | Q02753        | 160           | 160        | 1–160              | 100                | <i>Haloarcula marismortui</i>                                           | 1VQ8_Q               |
| <b>rpL22</b> | <b>L22e</b>    | <b><i>Saccharomyces cerevisiae</i></b> | <b>P05749</b> | <b>121</b>    | <b>105</b> | <b>6–110</b>       | <b>87</b>          | <b>Artificial gene</b>                                                  | <b>2KL8_A</b>        |
| rpL23        | L14p           | <i>Saccharomyces cerevisiae</i>        | P04451        | 137           | 131        | 7–137              | 96                 | <i>Haloarcula marismortui</i>                                           | 1VQ8_K               |
| rpL24        | L24e           | <i>Saccharomyces cerevisiae</i>        | P04449        | 155           | 73         | 1–73               | 47                 | <i>Haloarcula marismortui</i>                                           | 1VQ8_U               |
| rpL25        | L23p           | <i>Saccharomyces cerevisiae</i>        | P04456        | 142           | 122        | 21–142             | 86                 | <i>Haloarcula marismortui</i>                                           | 1VQ8_S               |
| rpL26        | L24p           | <i>Saccharomyces cerevisiae</i>        | P05743        | 127           | 123        | 1–123              | 97                 | <i>Haloarcula marismortui</i>                                           | 1VQ8_T               |
| <b>rpL27</b> | <b>L27e</b>    | <b><i>Saccharomyces cerevisiae</i></b> | <b>P0C2H6</b> | <b>136</b>    | <b>95</b>  | <b>5–99</b>        | <b>70</b>          | <b><i>Sulfolobus solfataricus</i></b>                                   | <b>2JOY_A</b>        |
| rpL28        | L15p           | <i>Saccharomyces cerevisiae</i>        | P02406        | 149           | 149        | 1–149              | 100                | <i>Haloarcula marismortui</i>                                           | 1VQ8_L               |
| <b>rpL29</b> | <b>L29e</b>    | <b><i>Saccharomyces cerevisiae</i></b> | <b>P05747</b> | <b>59</b>     | <b>22</b>  | <b>38–59</b>       | <b>37</b>          | <b><i>Oryctolagus cuniculus</i></b>                                     | <b>1UTG_A</b>        |
| rpL30        | L30e           | <i>Saccharomyces cerevisiae</i>        | P14120        | 105           | 105        | 1–105              | 100                | <i>Saccharomyces cerevisiae</i>                                         | 1CN7_A               |
| rpL31        | L31e           | <i>Saccharomyces cerevisiae</i>        | P0C2H8        | 113           | 110        | 1–110              | 97                 | <i>Haloarcula marismortui</i>                                           | 1VQ8_X               |
| rpL32        | L32e           | <i>Saccharomyces cerevisiae</i>        | P38061        | 130           | 130        | 1–130              | 100                | <i>Haloarcula marismortui</i>                                           | 1VQ8_Y               |
| <b>rpL33</b> | <b>L35ae</b>   | <b><i>Saccharomyces cerevisiae</i></b> | <b>P05744</b> | <b>107</b>    | <b>100</b> | <b>1–100</b>       | <b>93</b>          | <b><i>Pyrococcus furiosus</i></b>                                       | <b>15QR_A</b>        |
| <b>rpL34</b> | <b>L34e</b>    | <b><i>Saccharomyces cerevisiae</i></b> | <b>P87262</b> | <b>121</b>    | <b>118</b> | <b>1–118</b>       | <b>97</b>          | <b><i>Rhodobacter capsulatus</i></b>                                    | <b>2PPT_A</b>        |
| rpL35        | L29p           | <i>Saccharomyces cerevisiae</i>        | P39741        | 120           | 118        | 3–120              | 98                 | <i>Haloarcula marismortui</i>                                           | 1VQ8_V               |
| <b>rpL36</b> | <b>L36e</b>    | <b><i>Saccharomyces cerevisiae</i></b> | <b>P05745</b> | <b>100</b>    | <b>77</b>  | <b>24–100</b>      | <b>77</b>          | <b><i>Archeoglobus fulgidus</i></b>                                     | <b>2OEB_A</b>        |
| rpL37        | L37e           | <i>Saccharomyces cerevisiae</i>        | P49166        | 88            | 88         | 1–88               | 100                | <i>Haloarcula marismortui</i>                                           | 1VQ8_1               |
| <b>rpL38</b> | <b>L38e</b>    | <b><i>Saccharomyces cerevisiae</i></b> | <b>P49167</b> | <b>78</b>     | <b>78</b>  | <b>1–78</b>        | <b>100</b>         | <b><i>Homo sapiens</i></b>                                              | <b>1WH9_A</b>        |
| rpL39        | L39e           | <i>Saccharomyces cerevisiae</i>        | P04650        | 51            | 51         | 1–51               | 100                | <i>Haloarcula marismortui</i>                                           | 1VQ8_2               |
| <b>rpL40</b> | <b>L40e</b>    | <b><i>Saccharomyces cerevisiae</i></b> | <b>P14796</b> | <b>52</b>     | <b>40</b>  | <b>13–52</b>       | <b>77</b>          | <b><i>Sulfolobus solfataricus</i></b>                                   | <b>2AYJ_A</b>        |
| <b>rpL41</b> | <b>L41e</b>    | <b><i>Saccharomyces cerevisiae</i></b> | <b>P05746</b> | <b>25</b>     | <b>25</b>  | <b>1–25</b>        | <b>100</b>         | <b>de novo</b>                                                          | —                    |
| rpL42        | L44e           | <i>Saccharomyces cerevisiae</i>        | P02405        | 106           | 106        | 1–106              | 100                | <i>Haloarcula marismortui</i>                                           | 1VQ8_3               |
| rpL43        | L37ae          | <i>Saccharomyces cerevisiae</i>        | P49631        | 92            | 92         | 1–92               | 100                | <i>Haloarcula marismortui</i>                                           | 3CC2_Z               |
| rpP0         | L10p           | <i>Saccharomyces cerevisiae</i>        | P05317        | 312           | 257        | 1–257              | 82                 | <i>Pyrococcus horikoshii</i> and<br><i>Methanocaldococcus janaschii</i> | 3A1Y_G and<br>3JSY_A |
| rpP1         | L12p           | <i>Saccharomyces cerevisiae</i>        | P05318        | 106           | 58         | 5–62               | 54                 | <i>Pyrococcus horikoshii</i>                                            | 3A1Y_E               |
| rpP2         | L12p           | <i>Saccharomyces cerevisiae</i>        | P05319        | 106           | 58         | 1–58               | 55                 | <i>Pyrococcus horikoshii</i>                                            | 3A1Y_F               |

\*Bold rows indicate newly localized r proteins in this study, compared to the bacterial and archaeal X-ray structures.

**Table S6. Localization of unassigned eukaryotic 80S r proteins**

| Protein family | <i>Triticum aestivum</i> name | <i>Saccharomyces cerevisiae</i> name | Localization basis                                                                                                                                                                                                                                                                                                                                                                                                                                      |
|----------------|-------------------------------|--------------------------------------|---------------------------------------------------------------------------------------------------------------------------------------------------------------------------------------------------------------------------------------------------------------------------------------------------------------------------------------------------------------------------------------------------------------------------------------------------------|
| L6e            | L6                            | rpL6                                 | (i) Cross-linking and accessibility to proteolysis (1).<br>(ii) Comparison of <i>S. cerevisiae</i> and <i>T. aestivum</i> cryo-EM maps (which contain L6e) with the <i>Haloarcula marismortui</i> 50S X-ray structure and the <i>Pyrococcus furiosus</i> 70S cryo-EM structure (which lack L6e).<br>(iii) The N terminus of L6e was assigned based on differences between the density and the sequence of <i>T. aestivum</i> and <i>S. cerevisiae</i> . |
| L13e           | L13                           | rpL13                                | (i) Cross-linking and accessibility to proteolysis (1).<br>(ii) Heterogeneous distribution in archaea.                                                                                                                                                                                                                                                                                                                                                  |
| L14e           | L14                           | rpL14                                | (i) Fold search and secondary structure prediction.<br>(ii) Length differences between <i>S. cerevisiae</i> and <i>T. aestivum</i> L14e sequences, i.e., C terminus is longer in <i>T. aestivum</i> L14e and N terminus is longer in <i>S. cerevisiae</i> .                                                                                                                                                                                             |
| L18ae          | L18a                          | rpL20                                | (i) The difference between archaea and eukaryotes, namely, that majority of this density existed only on eukaryotic ribosomes.<br>(ii) Fold search revealed that the protein consists of two domains with a distinct LX motif.                                                                                                                                                                                                                          |
| L22e           | L22                           | rpL22                                | (i) Cross-linking and accessibility to proteolysis (1).<br>(ii) Comparison of <i>S. cerevisiae</i> and <i>T. aestivum</i> cryo-EM maps (which contain L22e) with the <i>H. marismortui</i> 50S X-ray structure and the <i>P. furiosus</i> 70S cryo-EM structure (which lack L22e).                                                                                                                                                                      |
| L27e           | L27                           | rpL27                                | (i) Cross-linking and accessibility to proteolysis (1).<br>(ii) Comparison of <i>S. cerevisiae</i> and <i>T. aestivum</i> cryo-EM maps (which contain L27e) with the <i>H. marismortui</i> 50S X-ray structure and the <i>P. furiosus</i> 70S cryo-EM structure (which lack L27e).                                                                                                                                                                      |
| L28e           | L28                           | —                                    | (i) Difference map between <i>S. cerevisiae</i> 80S cryo-EM map with <i>T. aestivum</i> 80S cryo-EM maps, because L28e does not exist in <i>S. cerevisiae</i> , but is present in <i>T. aestivum</i> (2).<br>(ii) Cross-linking and accessibility to proteolysis (1).                                                                                                                                                                                   |
| L29e           | L29                           | rpL29                                | (i) Cryo-EM reconstruction of $\Delta$ L29e-80S ribosome at 20.5 Å and comparison with yeast 80S ribosome from wild-type strain (Fig. 1 F–H).                                                                                                                                                                                                                                                                                                           |
| L34e           | L34                           | rpL34                                | Based on the fact that it exists in Eukarya and Archaea, on the fold of the model, and the fact that this was the only major density left unassigned.                                                                                                                                                                                                                                                                                                   |
| L35ae          | L35a                          | rpL33                                | (i) Cross-linking and accessibility to proteolysis (1).<br>(ii) Heterogeneous distribution in Archaea.                                                                                                                                                                                                                                                                                                                                                  |
| L36e           | L36                           | rpL36                                | (i) Cross-linking and accessibility to proteolysis (1).<br>(ii) Comparison of <i>S. cerevisiae</i> and <i>T. aestivum</i> cryo-EM maps (which contain L36e) with the <i>H. marismortui</i> 50S X-ray structure and the <i>P. furiosus</i> 70S cryo-EM structure (which lack L36e).                                                                                                                                                                      |
| L38e           | L38                           | rpL38                                | (i) Cryo-EM reconstruction of $\Delta$ L38e-80S ribosome at 21 Å and comparison with yeast 80S ribosome from wildtype strain (Fig. 1 C–E).                                                                                                                                                                                                                                                                                                              |
| L40e           | L40                           | rpL40                                | (i) Fold and the size of the protein.                                                                                                                                                                                                                                                                                                                                                                                                                   |
| L41e           | L41                           | rpL41                                | (i) Size and density features: L41e is only 25 amino acids.<br>(ii) Location: isolated density that is unlikely to be an RNA or an r-protein extension.                                                                                                                                                                                                                                                                                                 |
| S4e            | S4                            | rpS4                                 | (i) Cross-linking (3).<br>(ii) Structural information from <i>Thermoplasma acidophilum</i> PDB 3KBG.                                                                                                                                                                                                                                                                                                                                                    |
| S7e            | S7                            | rpS7                                 | (i) Immuno-EM (4).                                                                                                                                                                                                                                                                                                                                                                                                                                      |
| S17e           | S17                           | rpS17                                | (i) Cross-linking (3).<br>(ii) Localization: All remaining density on the head of the small subunit was already assigned.<br>(iii) Structural information (5).                                                                                                                                                                                                                                                                                          |
| S19e           | S19                           | rpS19                                | (i) Location: Assembly precursors indicate S19e to be associated with the head of the small subunit (6).<br>(ii) Structural information (7).<br>(iii) Subsequently localized in the fungi 80S ribosome (8).                                                                                                                                                                                                                                             |

| Protein family | <i>Triticum aestivum</i> name | <i>Saccharomyces cerevisiae</i> name | Localization basis                      |
|----------------|-------------------------------|--------------------------------------|-----------------------------------------|
| S21e           | S21                           | rpS21                                | (i) Immuno-EM (4).                      |
| S24e           | S24                           | rpS24                                | (i) Immuno-EM (4).                      |
| S25e           | S25                           | rpS25                                | (i) Cross-linking to IRES elements (9). |
| S26e           | S26                           | rpS26                                | (i) Cross-linking to mRNA (10).         |
| S27e           | S27                           | rpS27                                | (i) Structural information (11).        |
| S28e           | S28                           | rpS28                                | (i) Cross-linking to mRNA (10).         |
| S30e           | S30                           | rpS30                                | (ii) Structural information (12).       |
|                |                               |                                      | (i) Cross-linking to mRNA (13, 14).     |

IRES, internal ribosome entry site.

- Marion MJ, Marion C (1987) Localization of ribosomal proteins on the surface of mammalian 60S ribosomal subunits by means of immobilized enzymes. Correlation with chemical cross-linking data. *Biochem Biophys Res Commun* 149:1077–1083.
- Lecompte O, et al. (2002) Comparative analysis of ribosomal proteins in complete genomes: An example of reductive evolution at the domain scale. *Nucleic Acids Res* 30:5382–5390.
- Gross B, Westermann P, Bielka H (1983) Spatial arrangement of proteins within the small subunit of rat liver ribosomes studied by cross-linking. *EMBO J* 2:255–260.
- Bommer UA, Lutsch G, Stahl J, Bielka H (1991) Eukaryotic initiation factors eIF-2 and eIF-3: Interactions, structure and localization in ribosomal initiation complexes. *Biochimie* 73:1007–1019.
- Wu B, et al. (2008) The solution structure of ribosomal protein S17E from *Methanobacterium thermoautotrophicum*: A structural homolog of the FF domain. *Protein Sci* 17:583–588.
- Ferreira-Cerca S, et al. (2007) Analysis of the in vivo assembly pathway of eukaryotic 40S ribosomal proteins. *Mol Cell* 28:446–457.
- Gregory LA, et al. (2007) Molecular basis of Diamond-Blackfan anemia: Structure and function analysis of RPS19. *Nucleic Acids Res* 35:5913–5921.
- Taylor DJ, et al. (2009) Comprehensive molecular structure of the eukaryotic ribosome. *Structure* 17:1591–1604.
- Nishiyama T, Yamamoto H, Uchiyama T, Nakashima N (2007) Eukaryotic ribosomal protein RPS25 interacts with the conserved loop region in a dicistronic intergenic internal ribosome entry site. *Nucleic Acids Res* 35:1514–1521.
- Pisarev AV, et al. (2008) Ribosomal position and contacts of mRNA in eukaryotic translation initiation complexes. *EMBO J* 27:1609–1621.
- Herve du Penhoat C, et al. (2004) The NMR solution structure of the 30S ribosomal protein S27e encoded in gene RS27\_ARCFU of *Archaeoglobus fulgidis* reveals a novel protein fold. *Protein Sci* 13:1407–1416.
- Aramini JM, et al. (2003) Solution NMR structure of the 30S ribosomal protein S28E from *Pyrococcus horikoshii*. *Protein Sci* 12:2823–2830.
- Bulygin K, et al. (2005) The first position of a codon placed in the A site of the human 80S ribosome contacts nucleotide C1696 of the 18S rRNA as well as proteins S2, S3, S3a, S30, and S15. *Biochemistry* 44:2153–2162.
- Takahashi Y, Mitsuma T, Hirayama S, Odani S (2002) Identification of the ribosomal proteins present in the vicinity of globin mRNA in the 40S initiation complex. *J Biochem* 132:705–711.
